# Supplementary material
Source: Springer Nature journal article supplement (https://www.springermedizin.de/resource/supplementary/12936_2012_2525_MOESM1_ESM.pdf/9543186)

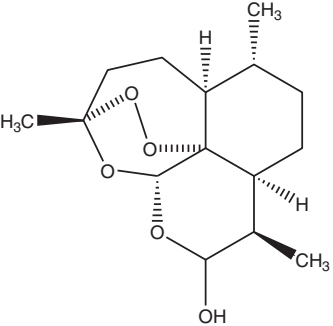

DHA

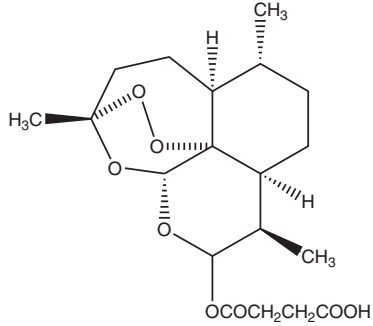

ARS

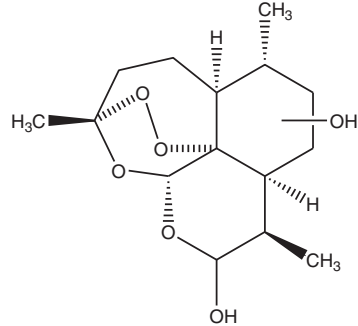

M1

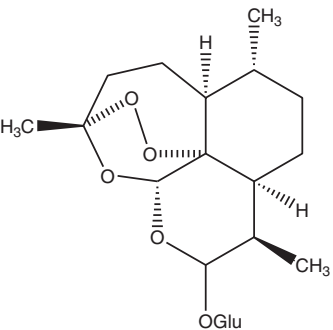

DHA-G

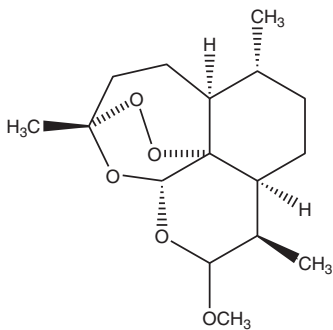

Artemether

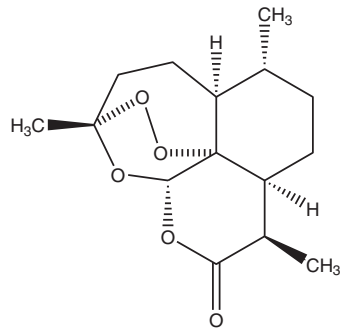

QHS

Supplement: MOESM1 [file 9543186]
